# Supplementary material for: Hierarchical metal–organic frameworks constructed from intergrowth for the adsorption of light hydrocarbons
Source: Royal Society of Chemistry journal article supplement (doi:10.1039/d0qm00352b), 2020-01-01
Supplement: d0qm00352b1.pdf [file d0qm00352b1.pdf]

# Hierarchical Metal-Organic Frameworks constructed from intergrowth for light hydrocarbons adsorption

*Xinyang Yin and Xueyi Zhang\**

Department of Chemical Engineering, The Pennsylvania State University, 216 Chemical and  
Biomedical Engineering Building, University Park, PA 16802, USA

## Table of Contents

|                                                                                                                                                                                  |      |
|----------------------------------------------------------------------------------------------------------------------------------------------------------------------------------|------|
| Table of Contents .....                                                                                                                                                          | 2-3  |
| Supporting Information Figures .....                                                                                                                                             | 4-18 |
| <b>SI Fig. 1</b> Powder XRD patterns of intergrowth MOFs $M^{II}_2(ndc)_2(dabco)$ on $M^I_2(ndc)_2(dabco)$ ( $M^{II}$ and $M^I = Cu, Zn, Ni, Co$ ) .....                         | 4    |
| <b>SI Fig. 2</b> Particle morphology and EDX spectrum images of intergrowth MOFs $M^{II}_2(ndc)_2(dabco)$ on $M^I_2(ndc)_2(dabco)$ ( $M^{II}$ and $M^I = Cu, Zn, Ni, Co$ ) ..... | 5    |
| <b>SI Fig. 3</b> Adsorption isotherms of methane, ethane, ethene, propane, and propene on Cu seed, Zn seed and Cu-on-Zn intergrowth .....                                        | 6    |
| <b>SI Fig. 4</b> Adsorption isotherm of methane, ethane, ethene, propane, and propene on Ni seed, Zn seed and Ni-on-Zn intergrowth .....                                         | 7    |
| <b>SI Fig. 5</b> Adsorption isotherm of methane, ethane, ethene, propane, and propene on Ni seed, Cu seed and Ni-on-Cu intergrowth .....                                         | 8    |
| <b>SI Fig. 6</b> Cumulative pore volume for: (a) Cu-on-Zn, Cu and Zn seed, (b) Ni-on-Cu, Ni and Cu seed, (c) Ni-on-Zn, Ni and Zn seed .....                                      | 9    |
| <b>SI Fig. 7</b> IAST-predicted adsorption amount and selectivity of mixed gases on Ni-on-Cu intergrowth:                                                                        |      |
| a). Ethane and methane; b). Ethene and methane; c). Propane and methane; d). Propene and methane .....                                                                           | 10   |
| <b>SI Fig. 8</b> IAST-predicted adsorption amount and selectivity of mixed gases on Cu-on-Zn intergrowth:                                                                        |      |
| a). Ethane and methane; b). Ethene and methane; c). Propane and methane; d). Propene and methane .....                                                                           | 11   |
| <b>SI Fig. 9</b> IAST-predicted adsorption amount and selectivity of mixed gases on Cu seed:                                                                                     |      |
| a). Ethane and methane; b). Ethene and methane; c). Propane and methane; d). Propene and methane .....                                                                           | 12   |
| <b>SI Fig. 10</b> IAST-predicted adsorption amount and selectivity of mixed gases on Ni seed:                                                                                    |      |
| a). Ethane and methane; b). Ethene and methane; c). Propane and methane; d). Propene and methane .....                                                                           | 13   |
| <b>SI Fig. 11</b> IAST-predicted adsorption amount and selectivity of mixed gases on Zn seed:                                                                                    |      |
| a). Ethane and methane; b). Ethene and methane; c). Propane and methane; d). Propene and methane .....                                                                           | 14   |

|                                                                                                                                                                                         |    |
|-----------------------------------------------------------------------------------------------------------------------------------------------------------------------------------------|----|
| <b>SI Fig. 12</b> Adsorption isotherm of Argon on Zn seed, Cu seed and Cu-on-Zn intergrowth, Zn seed, Ni seed and Ni-on-Zn intergrowth, Ni seed, Cu seed and Ni-on-Cu intergrowth ..... | 15 |
| <b>SI Fig. 13</b> Rietveld refinement for $\text{Zn}_2(\text{ndc})_2\text{dabco}$ (powder XRD patterns and atomic coordinates).....                                                     | 16 |
| <b>SI Fig. 14</b> Rietveld refinement for $\text{Ni}_2(\text{ndc})_2\text{dabco}$ (powder XRD patterns and atomic coordinates).....                                                     | 17 |
| <b>SI Fig. 15</b> Rietveld refinement for $\text{Co}_2(\text{ndc})_2\text{dabco}$ (powder XRD patterns and atomic coordinates).....                                                     | 18 |
| Supporting Information Tables .....                                                                                                                                                     | 19 |
| <b>SI Tab.1</b> Selectivity between alkane and methane, alkene and methane at 294 K for a mixture of 0.8 bar $\text{CH}_4$ and 0.2 bar $\text{C}_2$ or $\text{C}_3$ .....               | 19 |
| Synthesis procedure .....                                                                                                                                                               | 20 |
| Material characterization .....                                                                                                                                                         | 21 |

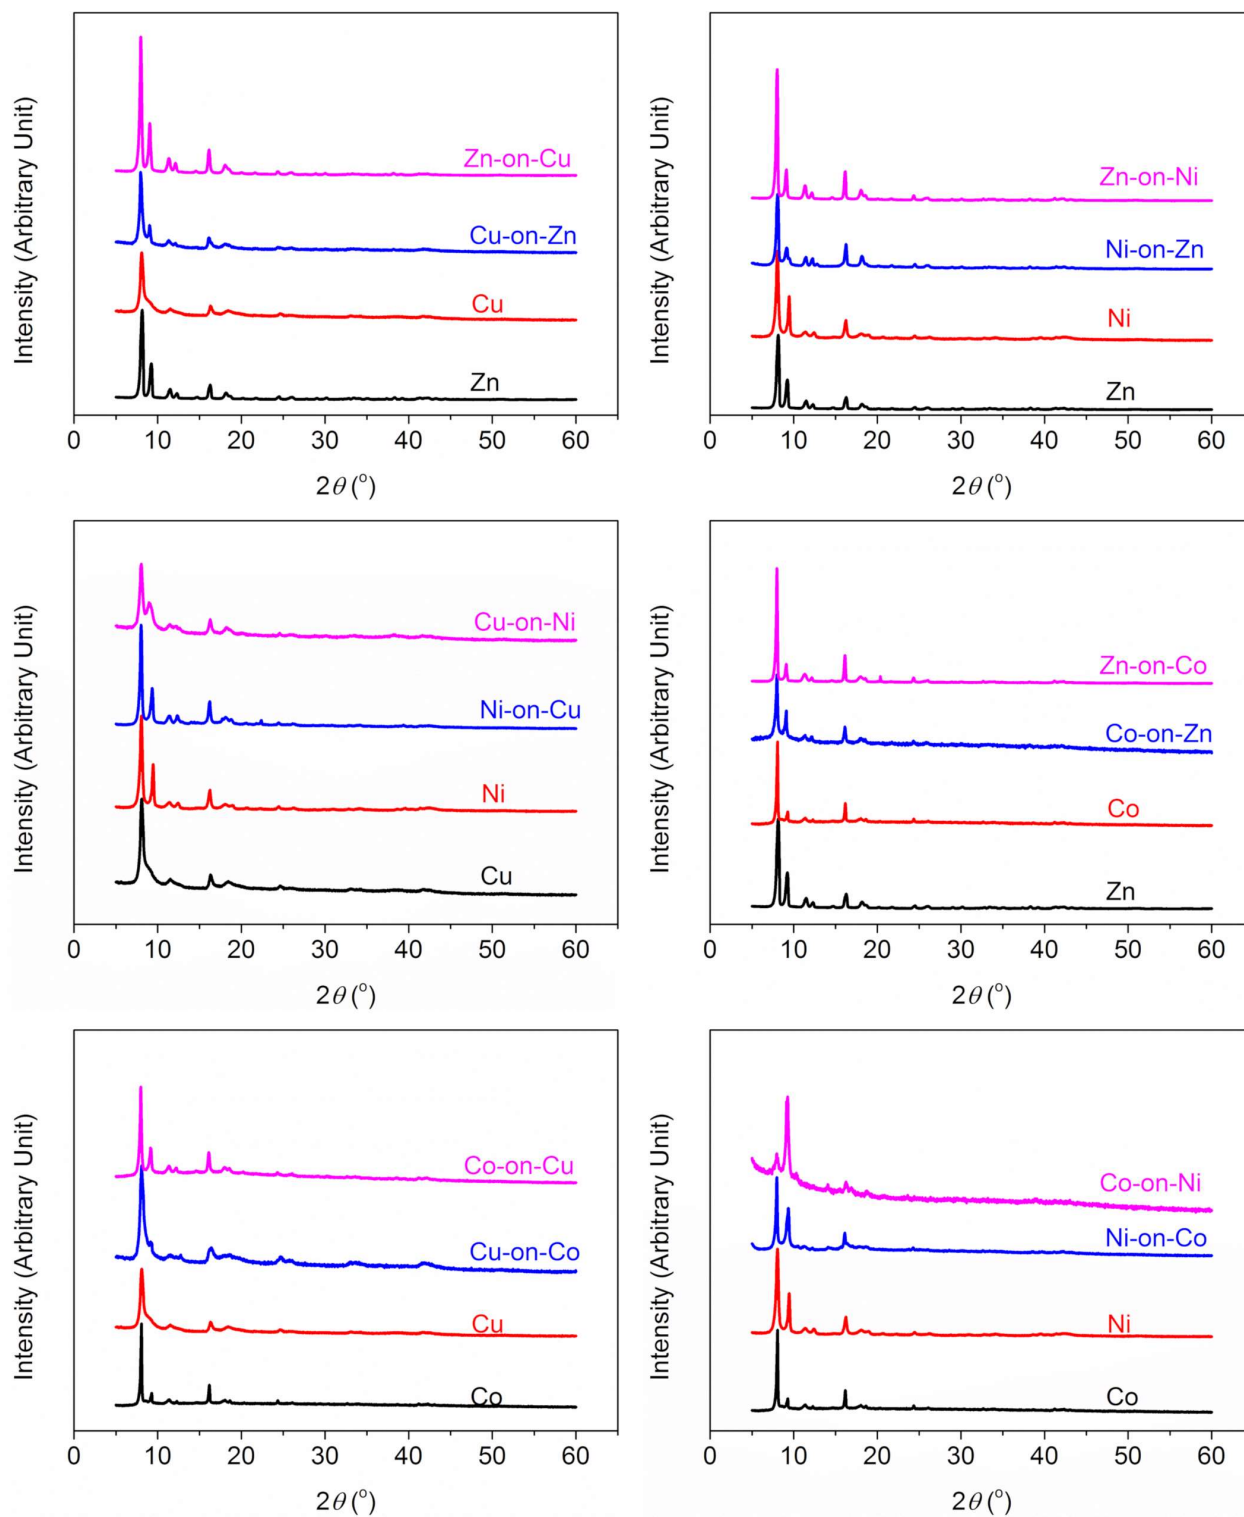

Figure S1. Powder XRD patterns of intergrowth MOFs  $M^{II}_2(ndc)_2(dabco)$  on  $M^I_2(ndc)_2(dabco)$  ( $M^{II}$  and  $M^I$  = Cu, Zn, Ni, Co)

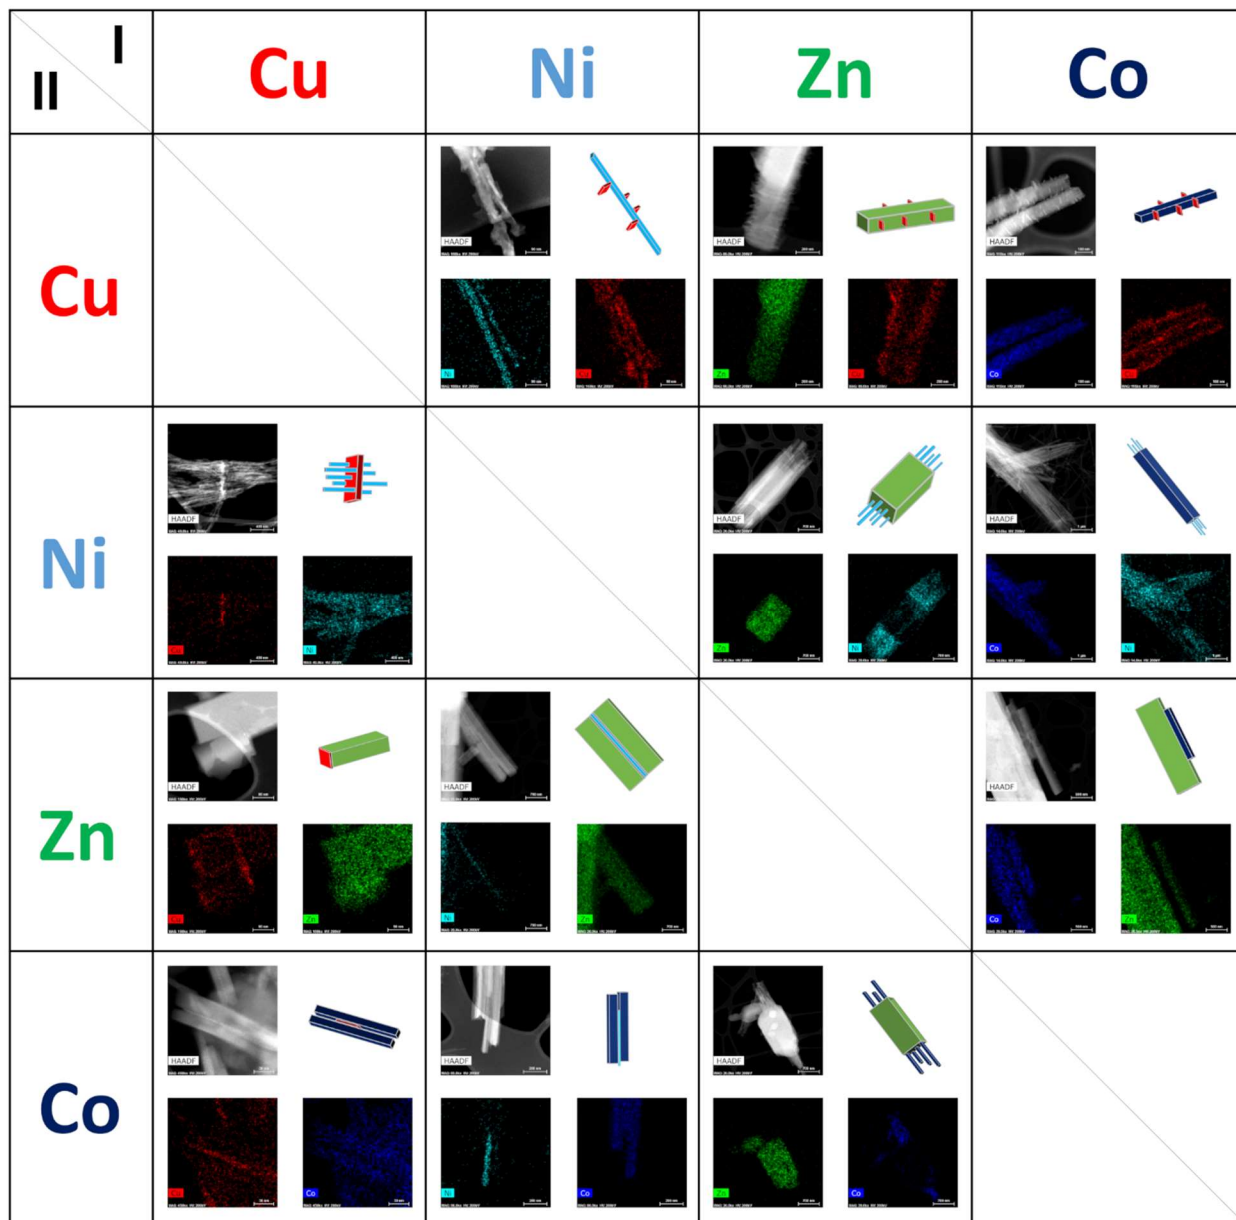

Figure S2. Particle morphology and EDX spectrum images of intergrowth MOFs  $M^{II}_2(ndc)_2(dabco)$  on  $M^I_2(ndc)_2(dabco)$  ( $M^{II}$  and  $M^I = Cu, Zn, Ni, Co$ )

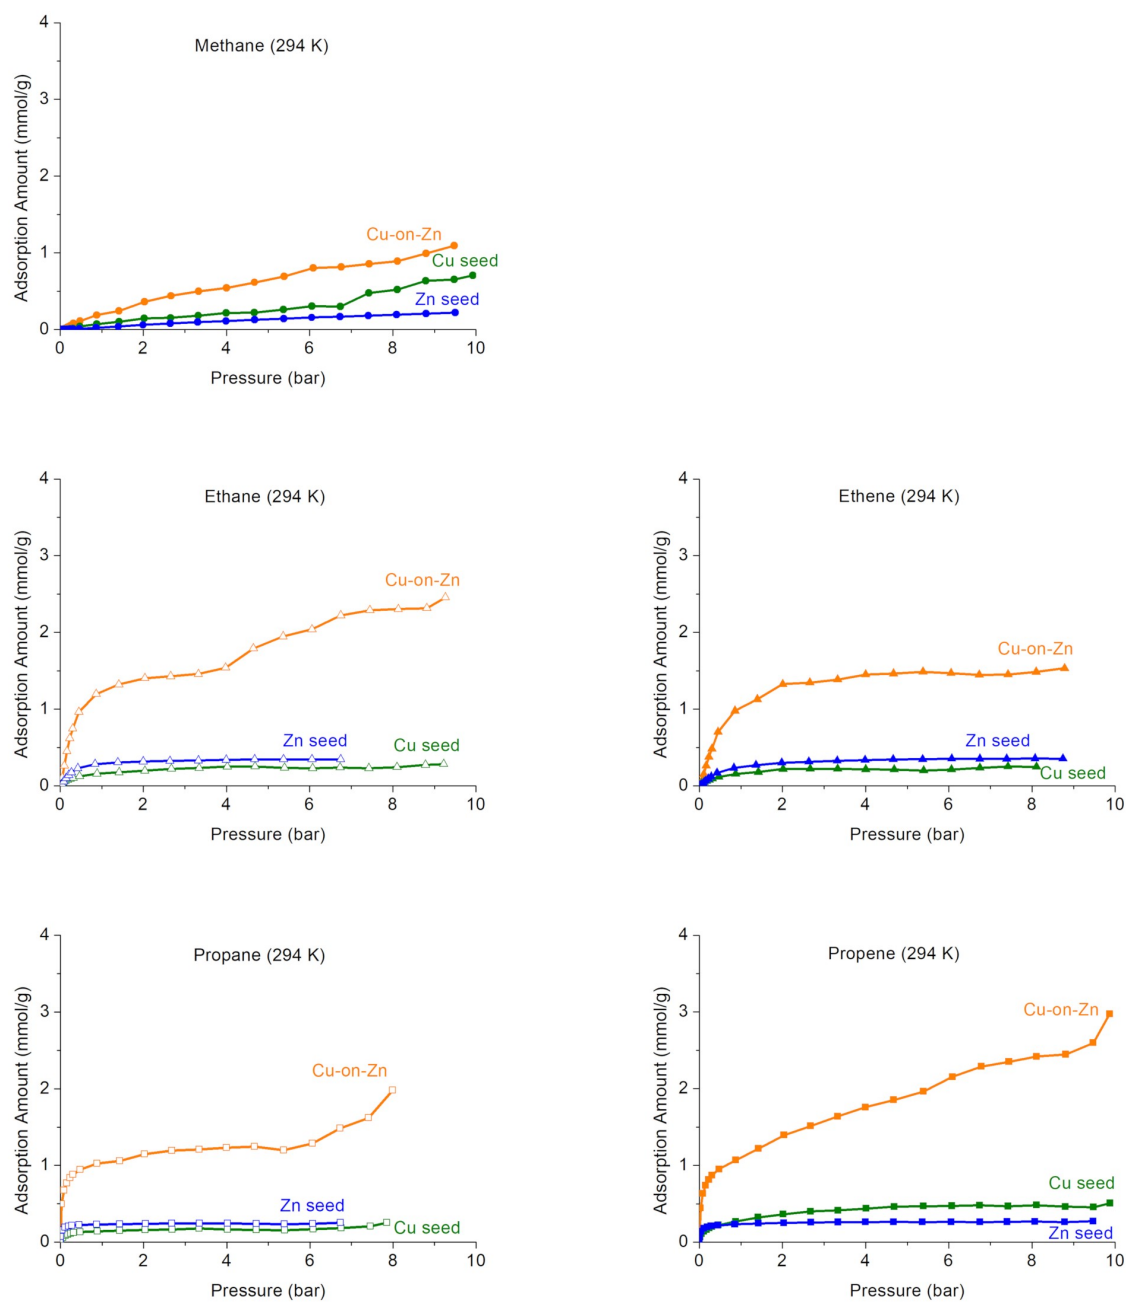

Figure S3. Adsorption isotherms of methane, ethane, ethene, propane, and propene on Cu seed, Zn seed and Cu-on-Zn intergrowth

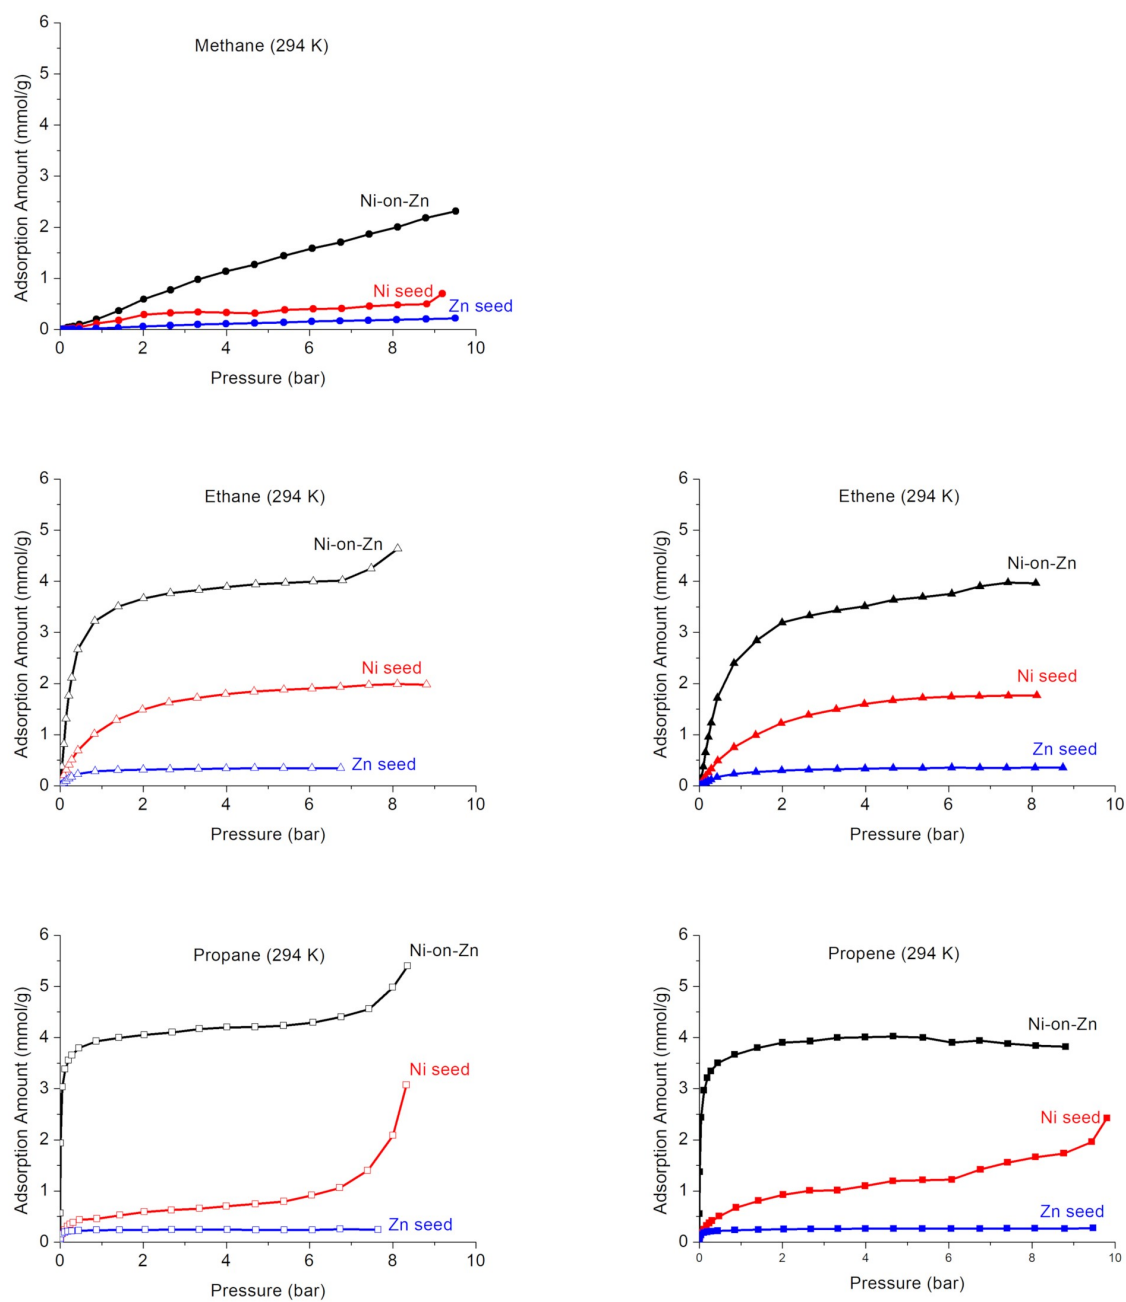

Figure S4. Adsorption isotherm of methane, ethane, ethene, propane, and propene on Ni seed, Zn seed and Ni-on-Zn intergrowth

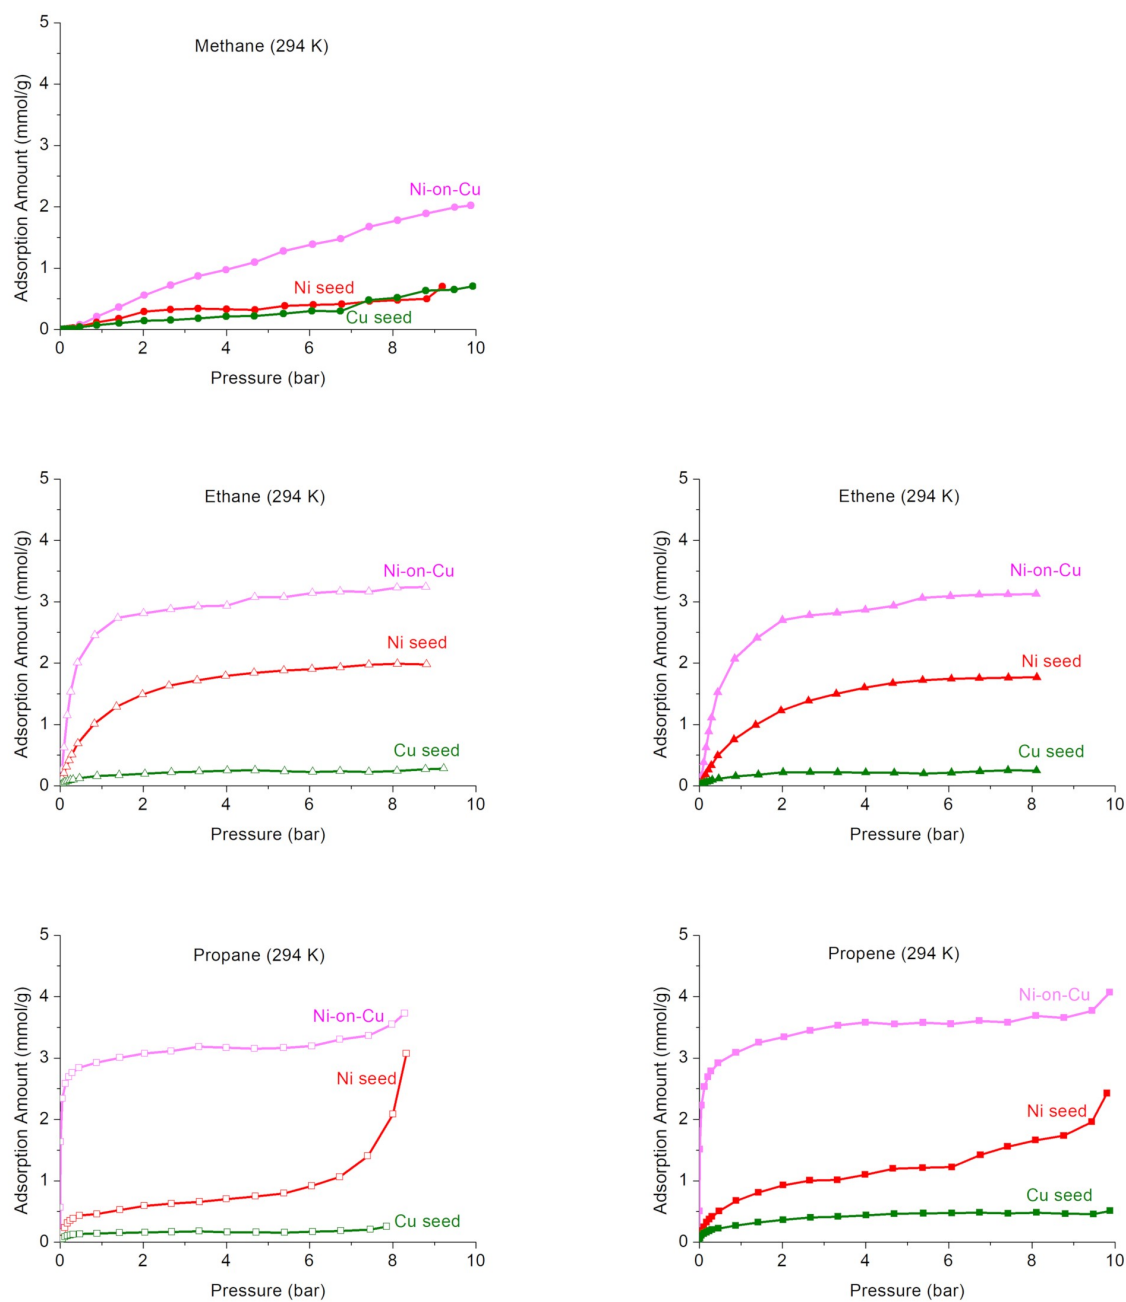

Figure S5. Adsorption isotherm of methane, ethane, ethene, propane, and propene on Ni seed, Cu seed and Ni-on-Cu intergrowth

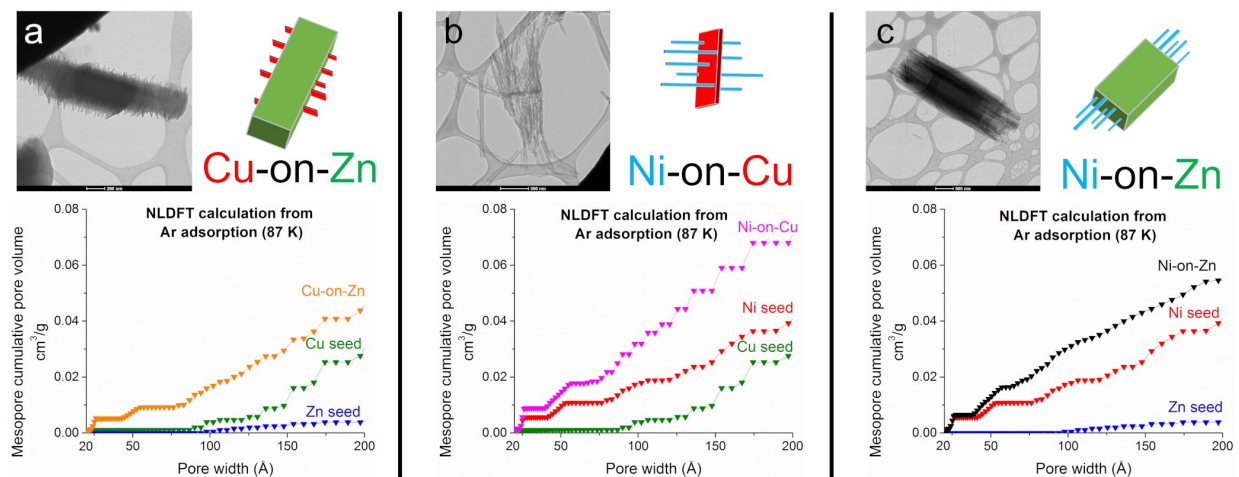

Figure S6. Cumulative pore volume 2-20nm measured by Ar adsorption at 87K for: (a) Cu-on-Zn, Cu and Zn seed, (b) Ni-on-Cu, Ni and Cu seed, (c) Ni-on-Zn, Ni and Zn seed.

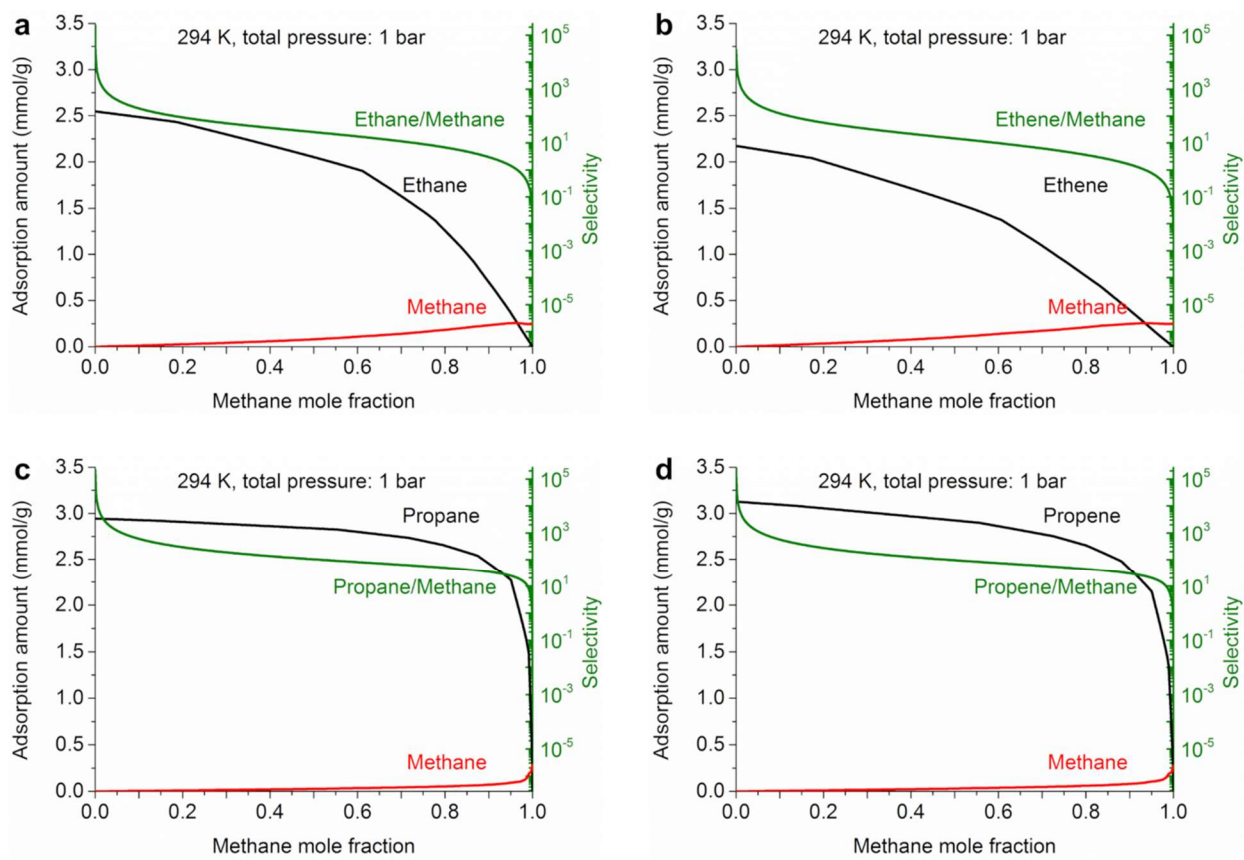

Figure S7. IAST-predicted adsorption amount and selectivity of mixed gases on Ni-on-Cu intergrowth: a). Ethane and methane; b). Ethene and methane; c). Propane and methane; d). Propene and methane

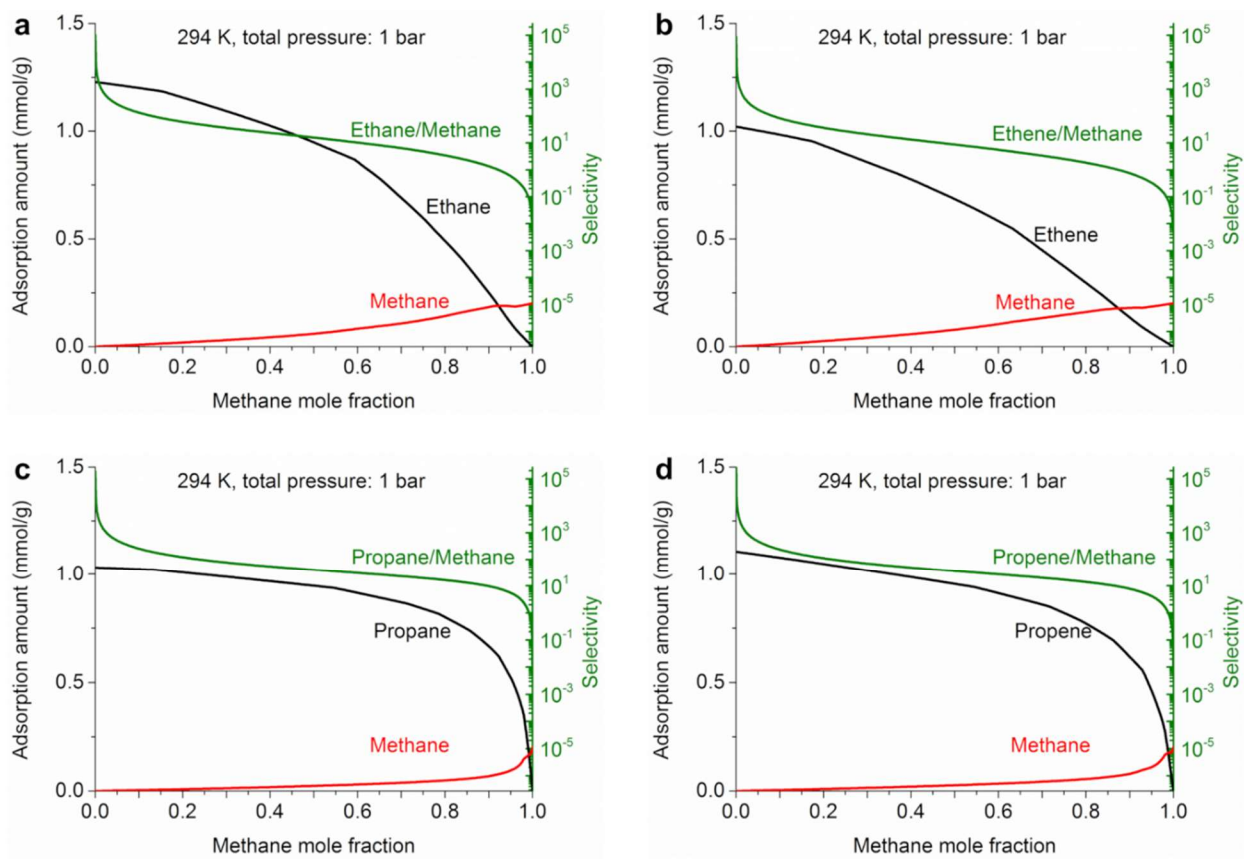

Figure S8. IAST-predicted adsorption amount and selectivity of mixed gases on Cu-on-Zn intergrowth: a). Ethane and methane; b). Ethene and methane; c). Propane and methane; d). Propene and methane

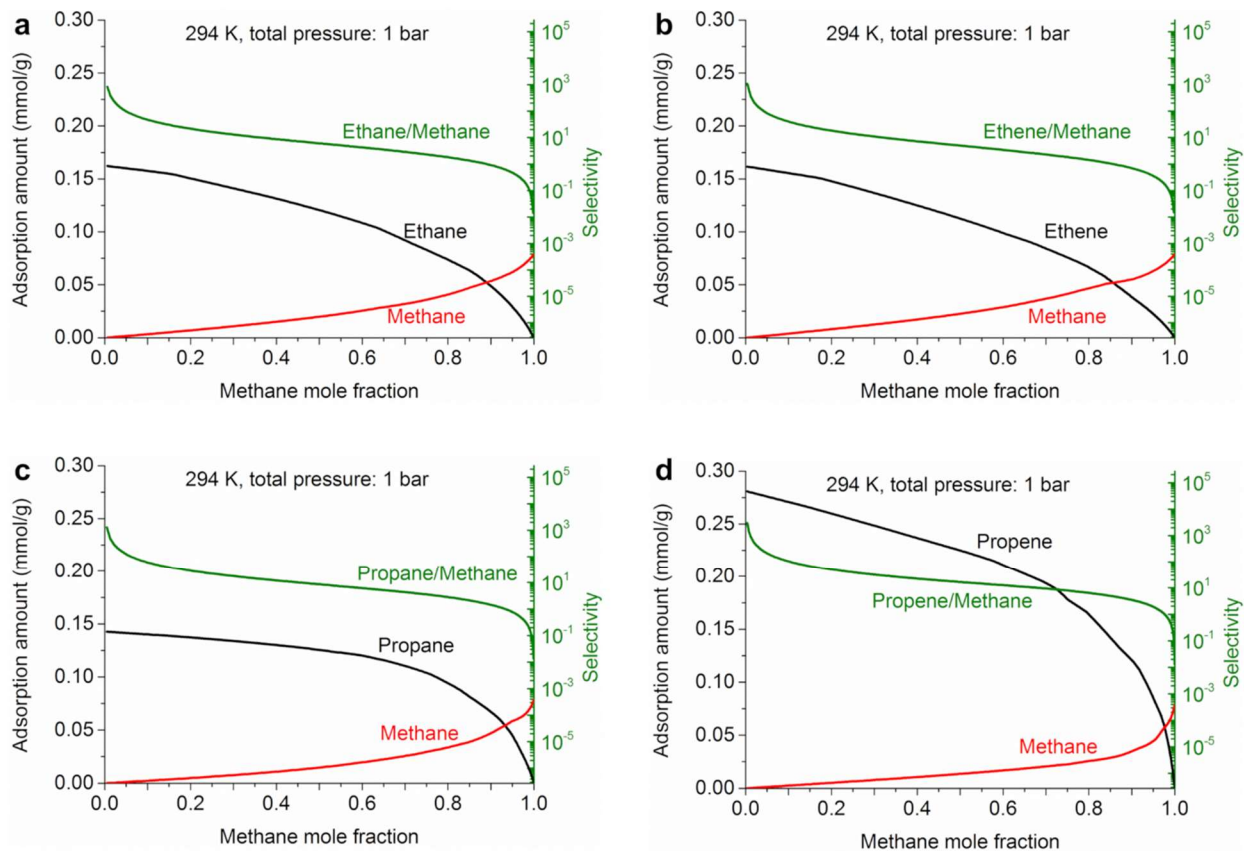

Figure S9. IAST-predicted adsorption amount and selectivity of mixed gases on Cu seed: a). Ethane and methane; b). Ethene and methane; c). Propane and methane; d). Propene and methane

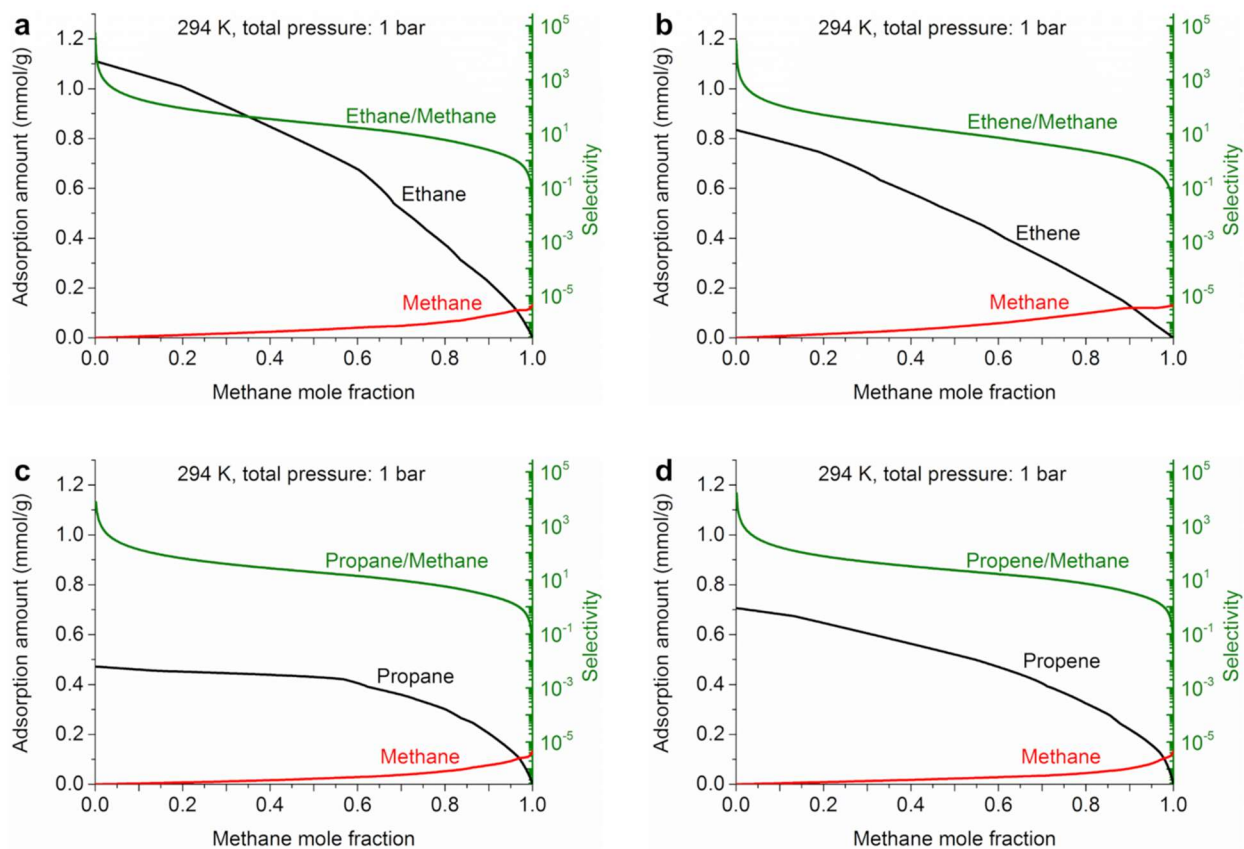

Figure S10. IAST-predicted adsorption amount and selectivity of mixed gases on Ni seed: a). Ethane and methane; b). Ethene and methane; c). Propane and methane; d). Propene and methane

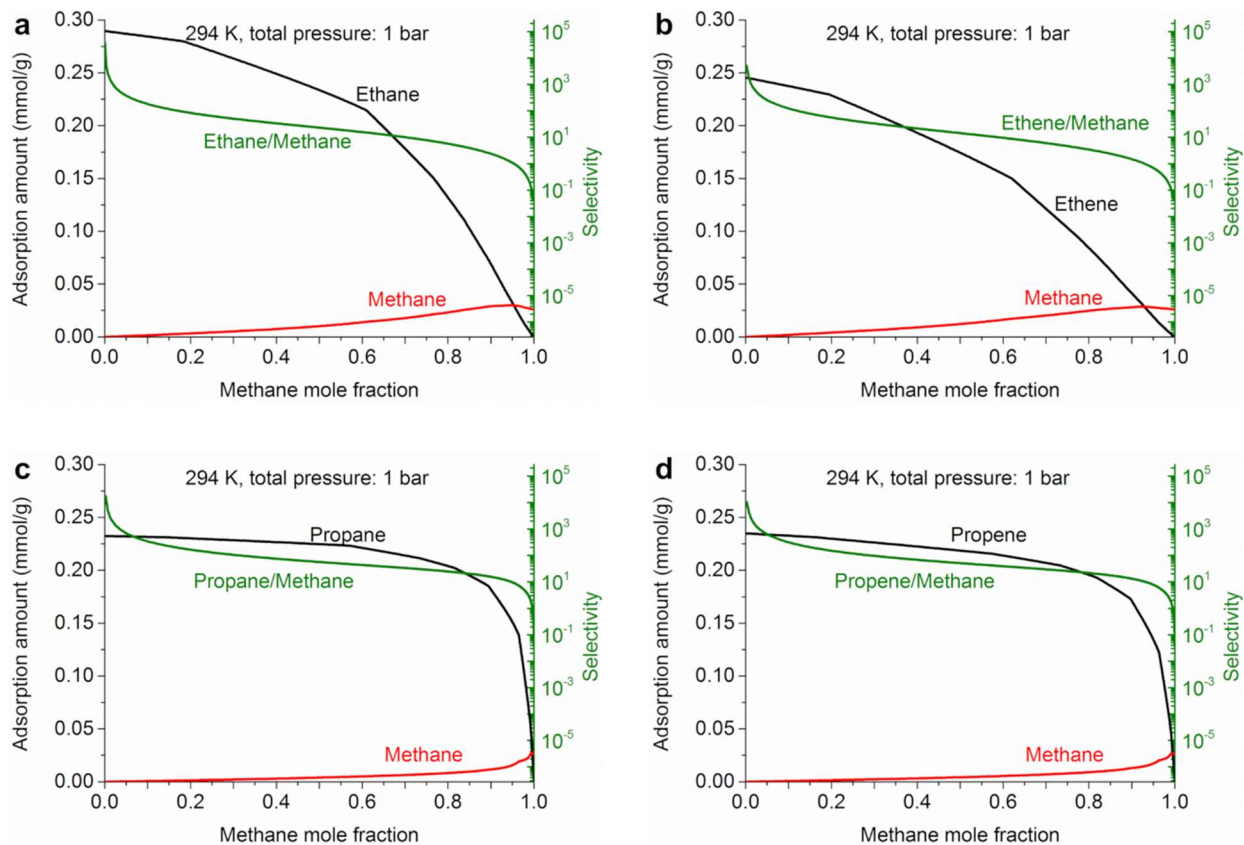

Figure S11. IAST-predicted adsorption amount and selectivity of mixed gases on Zn seed: a). Ethane and methane; b). Ethene and methane; c). Propane and methane; d). Propene and methane

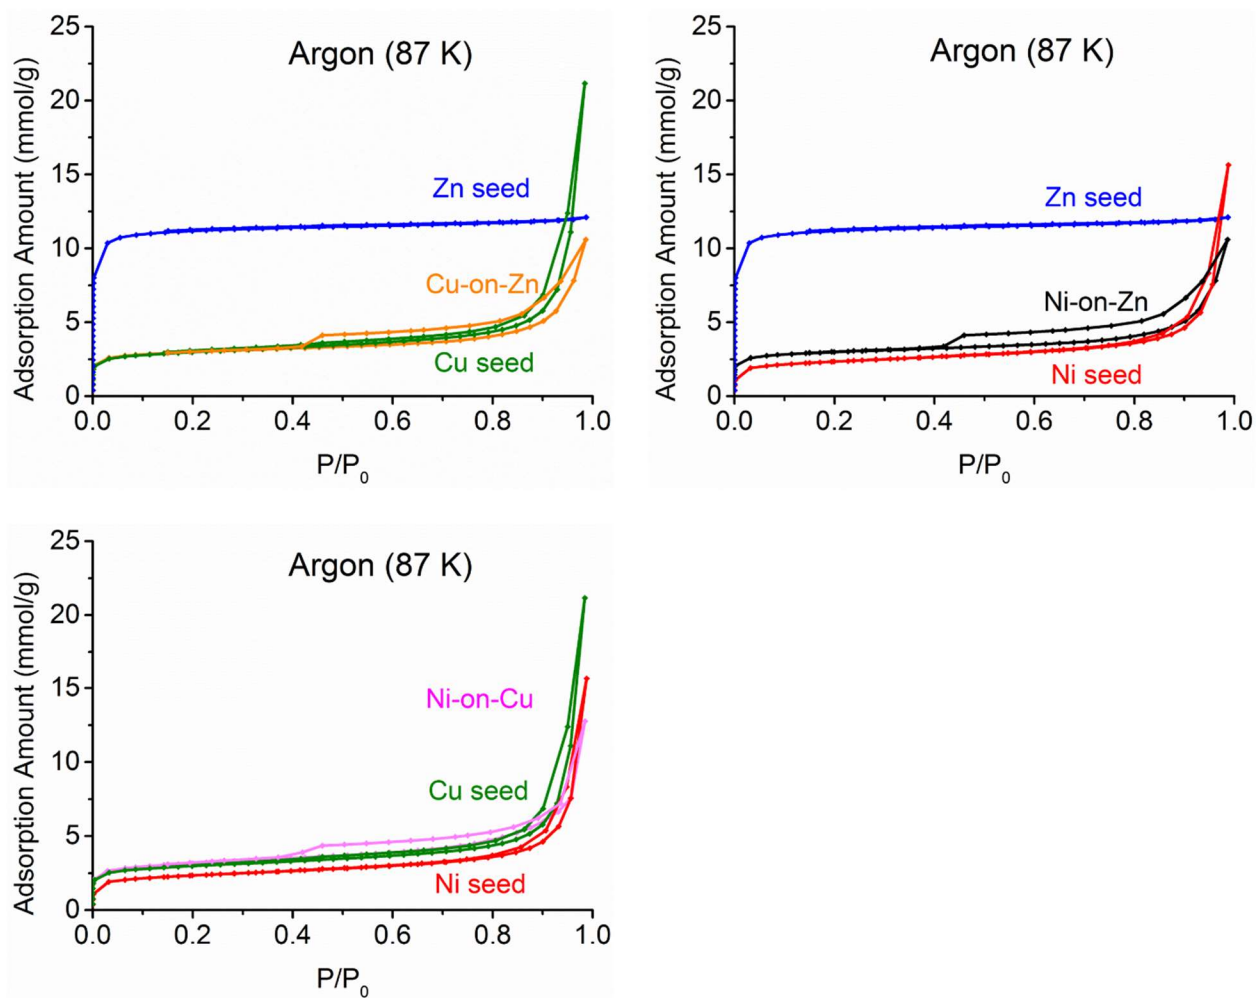

Figure S12. Adsorption isotherm of Argon on Zn seed, Cu seed and Cu-on-Zn intergrowth, Zn seed, Ni seed and Ni-on-Zn intergrowth, Ni seed, Cu seed and Ni-on-Cu intergrowth

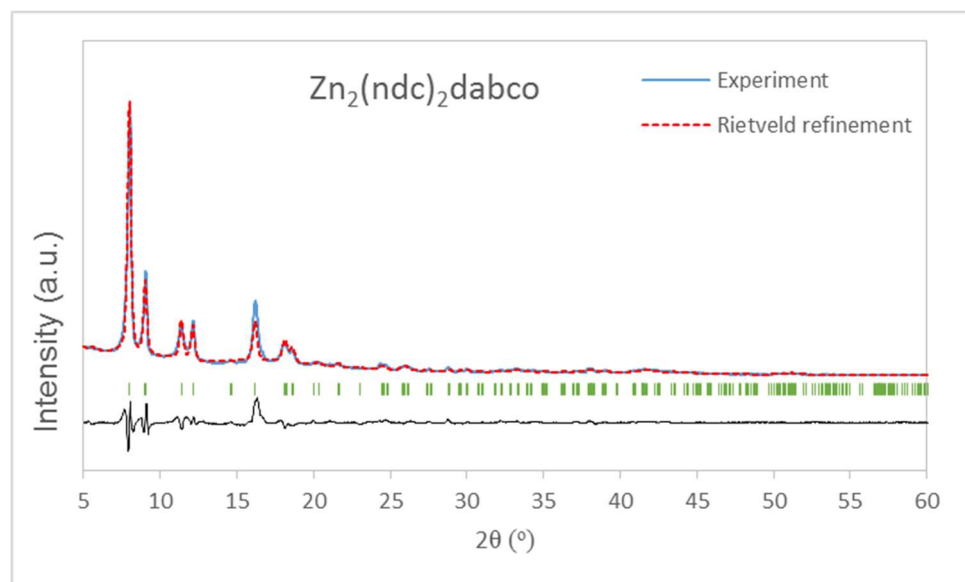

| Rwp=9.07%      |              | Rp=6.49%       |           | P4/mmm    |           |
|----------------|--------------|----------------|-----------|-----------|-----------|
| a=1.0847(3) nm |              | c=0.9631(3) nm |           |           |           |
| Atom           | Multiplicity | Occupancy      | x/a       | y/b       | z/c       |
| Zn1            | 2            | 1              | 0         | 0         | 0.138(1)  |
| C2             | 4            | 1              | 0         | 0.805(1)  | 0         |
| C3             | 4            | 1              | 0         | 0.3756    | 0         |
| C4             | 16           | 0.5            | 0.086(1)  | 0.4413(1) | 0.0835(1) |
| C5             | 8            | 0.25           | 0         | 0.88597   | 0.359(3)  |
| C6             | 16           | 0.25           | 0.09874   | 0.94299   | 0.362(3)  |
| N7             | 2            | 1              | 0         | 0         | 0.262(3)  |
| O8             | 8            | 1              | 0         | 0.863(1)  | 0.12213   |
| C9             | 16           | 0.25           | 0.1714(7) | 0.3752(5) | 0.168(1)  |
| C10            | 16           | 0.25           | 0.259(2)  | 0.441(2)  | 0.252(2)  |
| H10            | 16           | 0.25           | 0.16014   | 0.92734   | 0.33525   |
| H11            | 16           | 0.25           | 0.1023    | 0.85691   | 0.33525   |
| H12            | 16           | 0.25           | 0.17506   | 0.98285   | 0.33525   |
| H13            | 16           | 0.25           | 0.18064   | 0.28619   | 0.15671   |
| H14            | 16           | 0.25           | 0.32475   | 0.39681   | 0.29825   |
| H15            | 16           | 0.25           | 0.14817   | 0.39681   | 0.13548   |

Figure S13. Rietveld refinement for  $\text{Zn}_2(\text{ndc})_2\text{dabco}$  (powder XRD patterns and atomic coordinates)

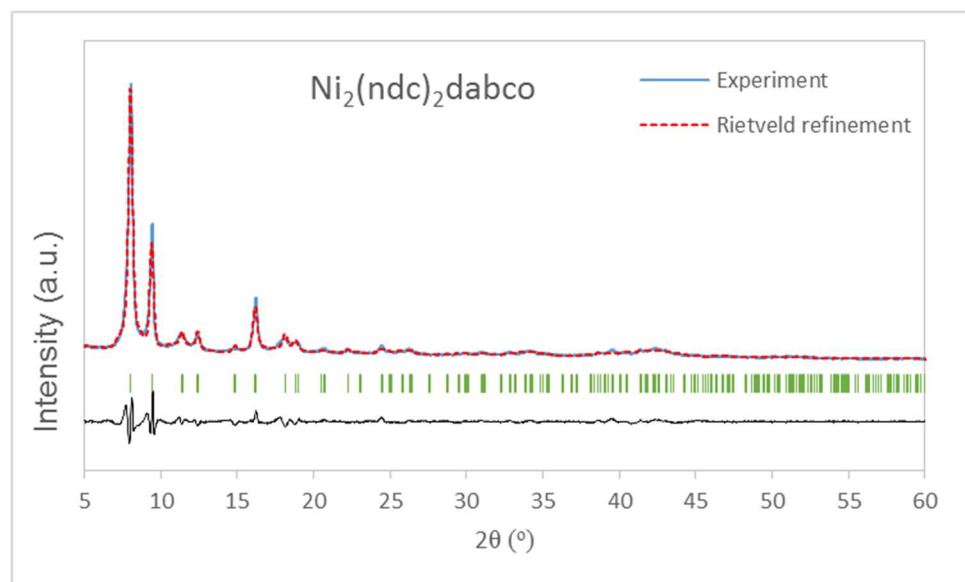

| Rwp=5.04%      |              | Rp=3.52%       |           |           |           |
|----------------|--------------|----------------|-----------|-----------|-----------|
| a=1.0872(3) nm |              | c=0.9287(3) nm |           | P4/mmm    |           |
| Atom           | Multiplicity | Occupancy      | x/a       | y/b       | z/c       |
| Ni1            | 2            | 1              | 0         | 0         | 0.1672(1) |
| C2             | 4            | 1              | 0         | 0.2239    | 0         |
| C3             | 4            | 1              | 0         | 0.36489   | 0         |
| C4             | 16           | 0.5            | 0.084(1)  | 0.4288(1) | 0.0826(9) |
| C5             | 8            | 0.25           | 0         | 0.11078   | 0.4202(1) |
| C6             | 16           | 0.25           | 0.05539   | 0.09593   | 0.4227(4) |
| N7             | 2            | 1              | 0         | 0         | 0.152(5)  |
| O8             | 8            | 1              | 0         | 0.1689(6) | 0.1209(1) |
| C9             | 16           | 0.25           | 0.1665(7) | 0.3646(5) | 0.167(1)  |
| C10            | 16           | 0.25           | 0.252(2)  | 0.428(2)  | 0.249(2)  |
| H10            | 16           | 0.25           | 0.07059   | 0.15558   | 0.39643   |
| H11            | 16           | 0.25           | 0.13901   | 0.09938   | 0.39643   |
| H12            | 16           | 0.25           | 0.01666   | 0.17007   | 0.39643   |
| H13            | 16           | 0.25           | 0.17549   | 0.27803   | 0.15512   |
| H14            | 16           | 0.25           | 0.31549   | 0.38549   | 0.29523   |
| H15            | 16           | 0.25           | 0.14394   | 0.38549   | 0.1341    |

Figure S14. Rietveld refinement for  $\text{Ni}_2(\text{ndc})_2\text{dabco}$  (powder XRD patterns and atomic coordinates)

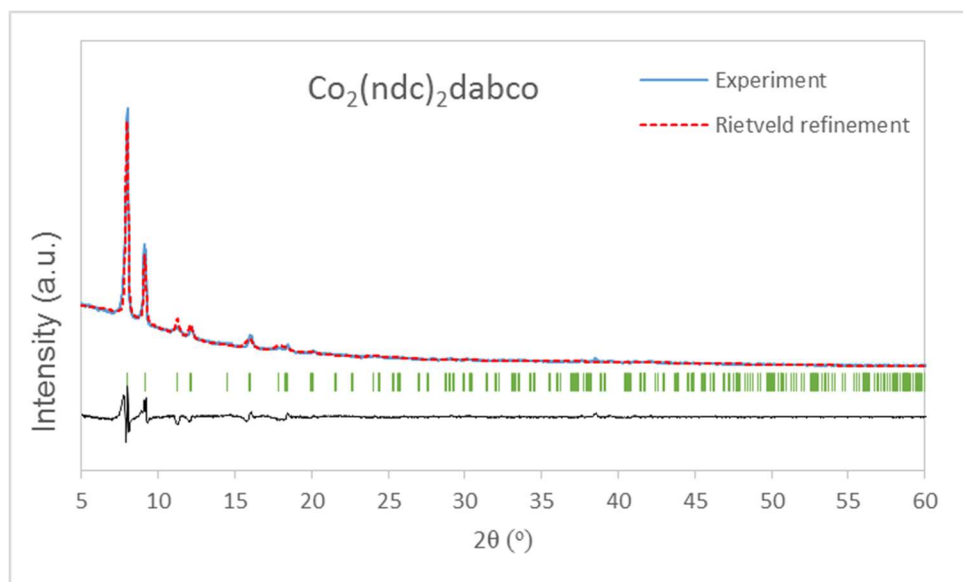

| Rwp=4.72%      |              | Rp=3.20%       |           |           |           |
|----------------|--------------|----------------|-----------|-----------|-----------|
| a=1.1115(1) nm |              | c=0.9693(2) nm |           | P4/mmm    |           |
| Atom           | Multiplicity | Occupancy      | x/a       | y/b       | z/c       |
| Co1            | 2            | 1              | 0         | 0         | 0.0936(3) |
| C2             | 4            | 1              | 0         | 0.22643   | 0         |
| C3             | 4            | 1              | 0         | 0.36902   | 0         |
| C4             | 16           | 0.5            | 0.085(1)  | 0.4336(1) | 0.0827(9) |
| C5             | 8            | 0.25           | 0         | 0.11203   | 0.4206(1) |
| C6             | 16           | 0.25           | 0.05602   | 0.09701   | 0.4231(4) |
| N7             | 2            | 1              | 0         | 0         | 0.323(5)  |
| O8             | 8            | 1              | 0         | 0.1699(6) | 0.1210(1) |
| C9             | 16           | 0.25           | 0.1684(7) | 0.3687(5) | 0.167(1)  |
| C10            | 16           | 0.25           | 0.255(3)  | 0.434(2)  | 0.249(2)  |
| H10            | 16           | 0.25           | 0.07139   | 0.15734   | 0.39678   |
| H11            | 16           | 0.25           | 0.14059   | 0.1005    | 0.39678   |
| H12            | 16           | 0.25           | 0.01685   | 0.17199   | 0.39678   |
| H13            | 16           | 0.25           | 0.17748   | 0.28117   | 0.15526   |
| H14            | 16           | 0.25           | 0.31906   | 0.38985   | 0.29549   |
| H15            | 16           | 0.25           | 0.14557   | 0.38985   | 0.13422   |

Figure S15. Rietveld refinement for  $\text{Co}_2(\text{ndc})_2\text{dabco}$  (powder XRD patterns and atomic coordinates)

**Table S1.** Selectivity between alkane and methane, alkene and methane at 294 K for a mixture of 0.8 bar CH<sub>4</sub> and 0.2 bar C<sub>2</sub> or C<sub>3</sub>.

| Gas             | Cu seed | Zn seed | Ni seed | Cu-on-Zn | Ni-on-Zn | Ni-on-Cu |
|-----------------|---------|---------|---------|----------|----------|----------|
| Ethane/Methane  | 1.8     | 5.7     | 5.9     | 3.5      | 3.1      | 6.9      |
| Ethene/Methane  | 1.4     | 3.4     | 2.4     | 1.8      | 3.7      | 3.6      |
| Propane/Methane | 2.8     | 24.6    | 5.7     | 16.5     | 52.9     | 49.8     |
| Propene/Methane | 6.4     | 21.6    | 7.2     | 14.0     | 42.6     | 44.5     |

## Synthesis

### Materials Synthesis

Cu(NO<sub>3</sub>)<sub>2</sub>·3H<sub>2</sub>O (Fisher Science Education), Zn(NO<sub>3</sub>)<sub>2</sub>·6H<sub>2</sub>O (Alfa Aesar), Ni(NO<sub>3</sub>)<sub>2</sub>·6H<sub>2</sub>O (Sigma Aldrich), Co(NO<sub>3</sub>)<sub>2</sub>·6H<sub>2</sub>O (Acros Organics), naphthalene-1,4-dicarboxylic acid (Alfa Aesar), 1,4-Diazabicyclo[2.2.2]Octane (Sigma Aldrich), Nitroterephthalic Acid (Alfa Aesar), Acetone (Fisher Science Education), N,N-Dimethylformamide (VWR BDH Chemicals) were used without further purification.

Seed particles MI<sub>2</sub>(ndc)<sub>2</sub>(dabco) (MI=Cu, Zn, Ni, Co, ndc =naphthalene-1,4-dicarboxylate, dabco=1,4-Diazabicyclo[2.2.2]Octane) were synthesized using conventional solvent-based method. In a typical synthesis, base linker dabco (0.0125 g) was added into Cu(NO<sub>3</sub>)<sub>2</sub>·3H<sub>2</sub>O (0.0376 g) (or alternatively Zn(NO<sub>3</sub>)<sub>2</sub>·6H<sub>2</sub>O, Ni(NO<sub>3</sub>)<sub>2</sub>·6H<sub>2</sub>O, Co(NO<sub>3</sub>)<sub>2</sub>·6H<sub>2</sub>O) Acetone (9.36 g) solution. DTBP(2,6-Di-tert-butylpyridine) (62.4 μL) was added with micropipette into acid linker (0.0240 g) ndc Acetone (10.00g) solution. Once linkers and metal salt were completely dissolved, acid linkers solution was added into metal salt solution. The final mixture has a molar ratio of Metal salt : ndc : dabco : DTBP : Acetone = 2.8 : 2 : 2 : 5 : 6000 and was shaken on an orbital shaker at 200 rpm for 48 hours. The solid in the resulting suspension was separated using centrifugation (4000 RCF). After 3 times washing with Acetone, the last precipitation was dispersed in 2 g of Acetone.

Intergrowth MII<sub>2</sub>(ndc)<sub>2</sub>(dabco) on MI<sub>2</sub>(ndc)<sub>2</sub>(dabco) (noted as MII-on-MI) was synthesized by conventional seeded growth method. In a typical procedure, MII = Cu(NO<sub>3</sub>)<sub>2</sub>·3H<sub>2</sub>O, (0.0188 g) (or alternatively Zn(NO<sub>3</sub>)<sub>2</sub>·6H<sub>2</sub>O, Ni(NO<sub>3</sub>)<sub>2</sub>·6H<sub>2</sub>O, Co(NO<sub>3</sub>)<sub>2</sub>·6H<sub>2</sub>O) was dissolved in Acetone (4.00 g). Acid Linker ndc (0.0120 g) was dissolved in Acetone (22.20 g). DTBP(2,6-Di-tert-butylpyridine) (124.7 μL) was added with micropipette into base linker dabco (0.0062 g) Acetone (22.20 g) solution. 66 μL seed dispersion was added into DTBP solution. Once linkers and metal salt were completely dissolved, acid linkers and metal solutions were added into seed solution. The final mixture has a molar ratio of Metal salt : ndc : dabco : DTBP : Acetone = 2.8 : 2 : 2 : 20 : 30000 and was shaken on an orbital shaker at 200 rpm for 48 hours. The solid in the resulting suspension was separated using centrifugation (4000 RCF).

## Material characterization

Powder XRD patterns were obtained using PANalytical Empyrean diffractometer (40 mA, 45 kV), Cu K $\alpha$  radiation ( $\lambda=1.54\text{\AA}$ ). TEM, STEM, and STEM-EDS micrographs were collected on FEI Talos F200X at 200 kV, and FEI Titan3 G2 at 300 kV. Bruker Esprit software was used to collect the element maps. SEM images of the synthesized pillared MOF were taken using FEI Helios NanoLab 660 FESEM and Thermo Fisher Scios 2 at 2 kV.

Physical adsorption of hydrocarbons was measured on a fixed-volume, vacuum/high-pressure barometric adsorption system at 295 K. Before each isotherm measurement, the samples were evacuated in a chamber under dynamic vacuum ( $6\times 10^{-7}$  mBar) at 373 K for 12 h with a Pfeiffer HiCube 80 turbomolecular pump. The samples were then cooled down to 295 K under vacuum ( $6\times 10^{-7}$  mBar). Adsorbate (methane, ethane, ethene, propane, propene) with known amount was injected into the sample chamber, and the pressure change after steady state was measured for the calculation of amount of gas adsorbed. The cumulative gas amount adsorbed was used to plot gas adsorption isotherms at 295 K.

Physical adsorption of Ar at 87 K was performed on a Micromeritics ASAP 2000 with same activation procedure mentioned above.
